# Supplementary material for: Neuropathological hallmarks in the post-mortem retina of neurodegenerative diseases
Source: PubMed Central journal article supplement (PMC11333524; doi:10.1007/s00401-024-02769-z), 2024-08-19
Supplement: 401_2024_2769_MOESM1_ESM.pdf [file 401_2024_2769_MOESM1_ESM.pdf]

## Supplemental tables

**Supplemental Table 1:** Cohort characteristics of cases in this study.

| Case | Age | Sex | Ocular history                  | Primary clinicopathological diagnosis | Group      | Braak NFT stage | Thal phase | Braak LB stage | LATE stage (0-3) | CAA (type/stage) | ARTAG | PART | CERAD |
|------|-----|-----|---------------------------------|---------------------------------------|------------|-----------------|------------|----------------|------------------|------------------|-------|------|-------|
| 1    | 33  | F   | -                               | Control                               | Controls - | 0               | 0          | 0              | 0                | -                | -     | -    | 0     |
| 2    | 47  | F   | -                               | Control                               | Controls - | 0               | 0          | 0              | 0                | -                | -     | -    | 0     |
| 3    | 49  | M   | -                               | Control                               | Controls - | 0               | 0          | 0              | 0                | -                | n.a.  | n.a. | 0     |
| 4    | 55  | F   | -                               | Control                               | Controls - | 0               | 0          | 0              | 0                | -                | -     | -    | 0     |
| 5    | 57  | F   | -                               | Control                               | Controls - | 0               | 0          | 0              | 0                | 1/2              | n.a.  | n.a. | 0     |
| 6    | 63  | F   | -                               | Control                               | Controls - | 0               | 0          | 0              | 0                | -                | n.a.  | n.a. | 0     |
| 7    | 68  | M   | -                               | Control                               | Controls - | 0               | 0          | 0              | 0                | -                | -     | n.a. | 0     |
| 8    | 60  | F   | -                               | Control                               | Controls + | 1               | 1          | 0              | 0                | 2/1              | -     | -    | 0     |
| 9    | 62  | F   | Retinal detachment (2007, 2009) | Control                               | Controls + | 1               | 0          | 0              | 0                | -                | -     | n.a. | 0     |
| 10   | 63  | F   | Glaucoma acute (1990/2015)      | Control                               | Controls + | 2               | 1          | 0              | 0                | 2/1              | -     | -    | 0     |
| 11   | 72  | F   | -                               | Control                               | Controls + | 3               | 1          | 0              | 0                | 2/1              | -     | yes  | 0     |
| 12   | 76  | F   | -                               | Control                               | Controls + | 2               | 0          | 0              | 0                | -                | yes   | yes  | 0     |
| 13   | 79  | F   | -                               | Control                               | Controls + | 1               | 0          | 0              | 0                | -                | n.a.  | n.a. | 0     |
| 14   | 79  | F   | -                               | Control                               | Controls + | 3               | 3          | 0              | 2                | 2/1              | ++    | -    | 2     |
| 15   | 80  | M   | -                               | Control                               | Controls + | 2               | 0          | 0              | 0                | -                | n.a.  | yes  | 0     |
| 16   | 80  | M   | Macular degeneration            | Control                               | Controls + | 2               | 4          | 0              | 0                | -                | n.a.  | n.a. | 0     |
| 17   | 80  | F   | -                               | Control                               | Controls + | 3               | 0          | 0              | 0                | -                | yes   | yes  | 0     |

|    |    |   |                                                    |         |            |   |   |      |   |     |      |      |   |
|----|----|---|----------------------------------------------------|---------|------------|---|---|------|---|-----|------|------|---|
| 18 | 81 | F | Macular pucker                                     | Control | Controls + | 2 | 1 | 0    | 0 | -   | -    | -    | 0 |
| 19 | 83 | F | -                                                  | Control | Controls + | 1 | 3 | 0    | 0 | 1/3 | -    | n.a. | 0 |
| 20 | 87 | M | -                                                  | Control | Controls + | 2 | 0 | 0    | 0 | -   | n.a. | n.a. | 0 |
| 21 | 89 | F | -                                                  | Control | Controls + | 2 | 2 | 0    | 0 | 2/1 | n.a. | n.a. | 0 |
| 22 | 89 | M | -                                                  | Control | Controls + | 1 | 1 | 0    | 0 | 2/2 | -    | -    | 0 |
| 23 | 90 | M | -                                                  | Control | Controls + | 2 | 1 | 0    | 0 | -   | -    | -    | 1 |
| 24 | 96 | F | -                                                  | Control | Controls + | 2 | 1 | 4    | 0 | 2/1 | -    | -    | 0 |
| 25 | 98 | F | Macular degeneration (dry) (2010), cataract (2011) | Control | Controls + | 2 | 0 | 0    | 0 | -   | +    | +    | 0 |
| 26 | 65 | M | -                                                  | AD      | Typical AD | 5 | 4 | 0    | 1 | 1/2 | +    | n.a. | 3 |
| 27 | 68 | F | -                                                  | AD      | Typical AD | 5 | 4 | 0    | 3 | 2/1 | yes  | -    | 2 |
| 28 | 70 | M | -                                                  | AD      | Typical AD | 6 | 5 | 0    | 0 | -   | n.a. | n.a. | 0 |
| 29 | 71 | M | -                                                  | AD      | Typical AD | 4 | 4 | n.a. | 0 | -   | n.a. | n.a. | 1 |
| 30 | 73 | F | Retinal detachment                                 | AD      | Typical AD | 6 | 5 | 0    | 0 | -   | n.a. | n.a. | 3 |
| 31 | 73 | M | -                                                  | AD      | Typical AD | 6 | 5 | 0    | 0 | 1/1 | +    | n.a. | 3 |
| 32 | 76 | F | -                                                  | AD      | Typical AD | 5 | 5 | 0    | 0 | 1/2 | -    | -    | 3 |
| 33 | 80 | F | -                                                  | AD      | Typical AD | 4 | 5 | 0    | 1 | 2/1 | +++  | n.a. | 2 |
| 34 | 82 | M | -                                                  | AD      | Typical AD | 5 | 5 | 0    | 3 | 2/1 | -    | n.a. | 3 |
| 35 | 82 | F | -                                                  | AD      | Typical AD | 5 | 5 | 0    | 1 | 1/1 | ++   | n.a. | 3 |
| 36 | 89 | F | -                                                  | AD      | Typical AD | 4 | 3 | 0    | 0 | -   | n.a. | n.a. | 1 |
| 37 | 91 | F | -                                                  | AD      | Typical AD | 5 | 4 | 0    | 2 | 1/2 | n.a. | n.a. | 3 |

|    |     |   |                                                                          |          |                     |      |   |   |   |     |          |      |   |
|----|-----|---|--------------------------------------------------------------------------|----------|---------------------|------|---|---|---|-----|----------|------|---|
| 38 | 95  | F | -                                                                        | AD       | Typical AD          | 4    | 3 | 3 | 0 | 2/1 | yes      | -    | 2 |
| 39 | 66  | F | -                                                                        | AD       | Atypical AD         | 6    | 5 | 0 | 0 | 2/1 | +/>+++   | n.a. | 3 |
| 40 | 61  | F | -                                                                        | AD       | Atypical AD         | 6    | 5 | 0 | 0 | 1/1 | -        | n.a. | 3 |
| 41 | 77  | M | -                                                                        | AD       | Atypical AD         | 4    | 5 | 0 | 0 | 2/1 | +        | n.a. | 2 |
| 42 | 72  | F | -                                                                        | AD       | Atypical AD         | 6    | 5 | 0 | 0 | 2/1 | -        | -    | 3 |
| 43 | 72  | M | -                                                                        | DLB      | Mixed pathology     | 3    | 4 | 6 | 0 | 1/3 | -        | -    | 2 |
| 44 | 76  | F | -                                                                        | MSA-c/p  | Mixed pathology     | 4    | 3 | 5 | 0 | -   | n.a.     | n.a. | 0 |
| 45 | 80  | M | -                                                                        | AD       | Mixed pathology     | 6    | 5 | 4 | 1 | 1/2 | ++       | n.a. | 3 |
| 46 | 84  | M | -                                                                        | MSA      | Mixed pathology     | 4    | 5 | 4 | 1 | 1/2 | +++      | -    | 1 |
| 47 | 84  | M | -                                                                        | AD       | Mixed pathology     | 4    | 5 | 3 | 0 | -   | +        | n.a. | 2 |
| 48 | 86  | F | -                                                                        | PDD      | Mixed pathology     | 1    | 0 | 5 | 3 | -   | +++      | n.a. | 0 |
| 49 | 86  | F | -                                                                        | DLB      | Mixed pathology     | 4    | 5 | 6 | 2 | 1/2 | -        | -    | 2 |
| 50 | 91  | F | -                                                                        | DLB      | Mixed pathology     | 3    | 3 | 6 | 0 | 2/1 | n.a.     | n.a. | 1 |
| 51 | 92  | M | Macular degeneration (dry) (2017), cataract (2012), vitrectomy OD (2012) | PD       | Mixed pathology     | 4    | 3 | 5 | 0 | 2/1 | +++      | -    | 1 |
| 52 | 93  | F | -                                                                        | PDD      | Mixed pathology     | 3    | 3 | 6 | 0 | 1/1 | +++ (AP) | -    | 1 |
| 53 | 103 | F | -                                                                        | ARTAG    | Mixed pathology     | 3    | 3 | 0 | 2 | 1/1 | +++      | n.a. | 1 |
| 54 | 59  | M | -                                                                        | CBD      | Primary tauopathies | 1    | 2 | 0 | 0 | 2/1 | +        | -    | 0 |
| 55 | 65  | M | -                                                                        | FTLD Tau | Primary tauopathies | n.a. | 1 | 0 | 0 | 2/1 | -        | n.a. | 0 |
| 56 | 65  | F | -                                                                        | PSP      | Primary tauopathies | 2    | 3 | 0 | 0 | -   | n.a.     | n.a. | 1 |

|    |    |   |                                                                                                                                                         |                           |                     |   |   |   |   |     |      |      |   |
|----|----|---|---------------------------------------------------------------------------------------------------------------------------------------------------------|---------------------------|---------------------|---|---|---|---|-----|------|------|---|
| 57 | 65 | M | -                                                                                                                                                       | PSP                       | Primary tauopathies | 2 | 1 | 0 | 0 | -   | -    | n.a. | 0 |
| 58 | 71 | M | -                                                                                                                                                       | FTLD Tau (Pick's disease) | Primary tauopathies | 2 | 2 | 3 | 1 | -   | -    | -    | 0 |
| 59 | 74 | F | -                                                                                                                                                       | CBD                       | Primary tauopathies | 1 | 3 | 0 | 0 | -   | n.a. | n.a. | 0 |
| 60 | 80 | M | -                                                                                                                                                       | PART/ARTAG                | Primary tauopathies | 2 | 0 | 0 | 0 | -   | +    | +    | 0 |
| 61 | 95 | F | -                                                                                                                                                       | PART/ARTAG                | Primary tauopathies | 3 | 1 | 0 | 0 | 2/1 | +    | ++   | 0 |
| 62 | 57 | F | -                                                                                                                                                       | MSA-p                     | Synucleinopathies   | 1 | 0 | 4 | 0 | -   | -    | -    | 0 |
| 63 | 57 | M | -                                                                                                                                                       | PD                        | Synucleinopathies   | 0 | 0 | 4 | 0 | -   | -    | -    | 0 |
| 64 | 59 | F | -                                                                                                                                                       | MSA-p                     | Synucleinopathies   | 2 | 1 | 3 | 0 | -   | -    | -    | 0 |
| 65 | 62 | F | -                                                                                                                                                       | PD                        | Synucleinopathies   | 1 | 0 | 4 | 0 | -   | n.a. | n.a. | 0 |
| 66 | 65 | M | -                                                                                                                                                       | PD                        | Synucleinopathies   | 1 | 0 | 3 | 0 | -   | -    | -    | 0 |
| 67 | 66 | F | Glaucoma (1996), recurrent eye inflammation (syndrome of Cogan), recurrent scleritis (2017), recurrent optic nerve inflammation (2018), cataract (2012) | PD                        | Synucleinopathies   | 1 | 0 | 6 | 0 | -   | -    | -    | 0 |
| 68 | 67 | M | -                                                                                                                                                       | PDD                       | Synucleinopathies   | 3 | 0 | 6 | 2 | -   | -    | ++   | 0 |
| 69 | 67 | F | -                                                                                                                                                       | MSA-c/p                   | Synucleinopathies   | 2 | 0 | 5 | 0 | -   | yes  | -    | 0 |
| 70 | 72 | M | -                                                                                                                                                       | PD                        | Synucleinopathies   | 2 | 1 | 6 | 0 | -   | -    | n.a. | 0 |
| 71 | 72 | F | Glaucoma                                                                                                                                                | MSA-p                     | Synucleinopathies   | 2 | 2 | 3 | 0 | -   | +    | -    | 0 |
| 72 | 72 | M | -                                                                                                                                                       | MSA-p                     | Synucleinopathies   | 1 | 1 | 5 | 0 | 1/1 | -    | -    | 0 |

|    |    |   |          |                          |                   |   |   |   |          |     |      |      |   |
|----|----|---|----------|--------------------------|-------------------|---|---|---|----------|-----|------|------|---|
| 73 | 72 | M | -        | PD                       | Synucleinopathies | 1 | 1 | 6 | 0        | -   | -    | n.a. | 0 |
| 74 | 73 | M | -        | PDD                      | Synucleinopathies | 3 | 1 | 6 | 0        | 2   | yes  | -    | 0 |
| 75 | 74 | M | -        | PDD                      | Synucleinopathies | 3 | 2 | 6 | 2        | 2/1 | -    | +++  | 0 |
| 76 | 75 | M | -        | PD                       | Synucleinopathies | 1 | 2 | 6 | 0        | 1/1 | -    | n.a. | 0 |
| 77 | 75 | M | -        | PDD                      | Synucleinopathies | 2 | 3 | 6 | 0        | 1/1 | -    | -    | 0 |
| 78 | 75 | M | -        | DLB                      | Synucleinopathies | 1 | 3 | 6 | 2        | 2/1 | -    | -    | 0 |
| 79 | 76 | M | -        | PDD                      | Synucleinopathies | 3 | 2 | 6 | 2        | -   | n.a. | n.a. | 1 |
| 80 | 77 | M | -        | PD                       | Synucleinopathies | 1 | 1 | 6 | 0        | -   | -    | ++   | 0 |
| 81 | 78 | M | Glaucoma | PDD                      | Synucleinopathies | 2 | 0 | 6 | 0        | -   | +    | +    | 0 |
| 82 | 78 | M | -        | PDD                      | Synucleinopathies | 2 | 1 | 6 | 0        | -   | yes  | -    | 0 |
| 83 | 79 | F | Glaucoma | PD                       | Synucleinopathies | 2 | 1 | 5 | 2        | -   | -    | -    | 0 |
| 84 | 80 | M | -        | PD                       | Synucleinopathies | 2 | 1 | 3 | 0        | 2/1 | -    | -    | 0 |
| 85 | 81 | F | -        | DLB                      | Synucleinopathies | 1 | 1 | 4 | 0        | -   | yes  | n.a. | 0 |
| 86 | 81 | M | -        | PDD                      | Synucleinopathies | 3 | 1 | 6 | 1        | 1/1 | n.a. | +    | 0 |
| 87 | 88 | F | -        | PDD                      | Synucleinopathies | 3 | 1 | 5 | 1        | -   | ++   | +    | 0 |
| 88 | 91 | F | -        | PDD                      | Synucleinopathies | 1 | 1 | 4 | 0        | 2/1 | n.a. | n.a. | 0 |
| 89 | 51 | F | -        | FTLD-TDP-E (sporadic)    | FTLD-TDP          | 0 | 1 | 0 | FTLD-TDP | -   | -    | -    | 0 |
| 90 | 58 | M | -        | FTLD-TDP-A (Progranulin) | FTLD-TDP          | 0 | 0 | 0 | FTLD-TDP | -   | +    | n.a. | 0 |
| 91 | 65 | M | -        | FTLD-TDP-B (c9orf)       | FTLD-TDP          | 2 | 1 | 0 | FTLD-TDP | 1/1 | -    | n.a. | 0 |
| 92 | 70 | M | -        | FTLD-TDP-B (c9orf)       | FTLD-TDP          | 1 | 1 | 0 | FTLD-TDP | 2/1 | +    | -    | 0 |
| 93 | 70 | F | -        | FTLD-TDP-A (c9orf?)      | FTLD-TDP          | 2 | 1 | 0 | FTLD-TDP | -   | -    | -    | 0 |

|     |    |   |          |                         |          |      |      |      |          |     |      |      |   |
|-----|----|---|----------|-------------------------|----------|------|------|------|----------|-----|------|------|---|
| 94  | 72 | M | Glaucoma | FTLD-TDP-C              | FTLD-TDP | n.a. | n.a. | n.a. | FTLD-TDP | -   | -    | n.a. | - |
| 95  | 74 | F | -        | FTLD-TDP-B (c9orf)      | FTLD-TDP | 2    | 1    | 0    | FTLD-TDP | -   | -    | -    | 0 |
| 96  | 75 | M | -        | FTLD-TDP-B (c9orf)      | FTLD-TDP | 2    | 3    | 0    | FTLD-TDP | -   | yes  | n.a. | 0 |
| 97  | 50 | M | -        | FTLD FUS                | OND      | 0    | 0    | 0    | 1        | -   | n.a. | n.a. | 0 |
| 98  | 54 | M | -        | MS                      | OND      | 1    | 0    | 0    | 0        | -   | -    | n.a. | 0 |
| 99  | 70 | F | -        | Hydrocephalus adultorum | OND      | 2    | 0    | 0    | 0        | -   | -    | yes  | 0 |
| 100 | 71 | M | -        | ALS                     | OND      | 1    | 1    | 0    | 0        | -   | -    | n.a. | 0 |
| 101 | 80 | M | -        | Vascular dementia       | OND      | 2    | 2    | 0    | 0        | +   | +    | -    | 0 |
| 102 | 84 | M | -        | FXTAS/FXAND/NIID        | OND      | 2    | 1    | 0    | 0        | 1/1 | +    | -    | 0 |

Abbreviations: ARTAG, age-related tau astrogliopathy, CBD, corticobasal degeneration, ALS, amyotrophic lateral sclerosis; FTLD, frontotemporal lobar degeneration; DLB, dementia with Lewy bodies; MS, multiple sclerosis; MSA, multiple system atrophy; n.a., not available; NFT, neurofibrillary tangles; PCA, posterior cortical atrophy; PD(D), Parkinson's disease (with dementia); PSP, progressive supranuclear palsy; PART, primary age-related tauopathy; -, absent.

**Supplemental Table 2:** Primary antibodies used in this study.

| Name      | Epitope                                     | Source                     | RRID       | Concentration | Dilution |
|-----------|---------------------------------------------|----------------------------|------------|---------------|----------|
| AT8       | Tau phosphorylated at Ser202/Thr205         | Thermo Scientific, MA, USA | AB_223647  | 0.25 µg/ml    | 1:800    |
| 4G8       | Amyloid-β <sub>17-24</sub>                  | BioLegend, San Diego CA    | AB_2564633 | n.a.          | 1:1000   |
| LB509     | Lewy bodies purified from patients with DLB | Thermo Scientific, MA, USA | AB_2920932 | 60 µg/ml      | 1:500    |
| KM51      | Full length (monoclonal antibody), NCL-ASYN | Novocastra, Leica          | AB_442103  | n.a.          | 1:250    |
| Anti-pTDP | TDP phosphorylated at Ser409/410            | Cosmo Bio USA, CA, USA     | AB_1961900 | n.a.          | 1:6000   |
| Anti-p62  | P62-lck ligand <sub>257-437</sub>           | BD Biosciences, CA, USA    | AB_398152  | 0.125 µg/ml   | 1:2000   |
